# Supplementary material
Source: HighWire-hosted journal article supplement (https://bmjopen.bmj.com/content/7/6/e017256)
Supplement: inline-supplementary-material-1 [file inline-supplementary-material-1.pdf]

**Supplementary table 1.** The association of 25(OH)D level with all-cause mortality in different models in secondary analyses (n = 6377)

|                                  | Model 2 |             | Model 3 |             | Model 4 |             |
|----------------------------------|---------|-------------|---------|-------------|---------|-------------|
|                                  | HR      | 95% CI      | HR      | 95% CI      | HR      | 95% CI      |
| 25(OH)D level quartiles (nmol/L) |         |             |         |             |         |             |
| 1 <sup>st</sup> (<34.5)          | 1.34    | (1.15–1.56) | 1.30    | (1.11–1.51) | 1.33    | (1.14–1.56) |
| 2 <sup>nd</sup> (34.5–45.1)      | 0.97    | (0.84–1.13) | 0.94    | (0.81–1.09) | 0.98    | (0.84–1.14) |
| 3 <sup>rd</sup> (45.2–58.0)      | 1.07    | (0.92–1.25) | 1.05    | (0.90–1.22) | 1.08    | (0.93–1.25) |
| 4 <sup>th</sup> (≥58.1)          | 1.00    |             | 1.00    |             | 1.00    |             |
| 25(OH)D level nmol/L             |         |             |         |             |         |             |
| <25.0                            | 1.51    | (1.23–1.87) | 1.47    | (1.19–1.82) | 1.52    | (1.23–1.88) |
| 25.0–49.9                        | 1.08    | (0.96–1.21) | 1.05    | (0.93–1.18) | 1.08    | (0.96–1.21) |
| 50.0–74.9                        | 1.00    |             | 1.00    |             | 1.00    |             |
| ≥75.0                            | 1.07    | (0.85–1.33) | 1.06    | (0.85–1.32) | 1.06    | (0.85–1.33) |

25(OH)D: 25-hydroxyvitamin D; CI: confidence interval; HR: hazard ratio

Secondary analyses: missing values ('unknown' in Tables 1 and 2) in covariates body mass index, daily smoker, alcohol consumption, physical activity, education, economic difficulties, and chronic illness (1<sup>st</sup> and 2<sup>nd</sup> definitions) were imputed by using multivariable chained imputation with fully conditional specification.

Model 2 adjusted for season of blood draw, age, sex, BMI, smoking, alcohol consumption, physical activity, education and economic difficulties; Model 3 adjusted for chronic illness (1<sup>st</sup> definition) at baseline in addition to Model 2; Model 4 adjusted for chronic illness (2<sup>nd</sup> definition) at baseline in addition to Model 2.

**Supplementary table 2.** The association of 25(OH)D level with all-cause mortality stratified by chronic illness in Model 2 in secondary analyses (n = 6377)

|                                              | 25(OH)D nmol/L quartiles<br>1 <sup>st</sup> vs. 4 <sup>th</sup> (reference) |             | 25(OH)D nmol/L<br><25.0 vs. 50.0–74.9 (reference) |             |
|----------------------------------------------|-----------------------------------------------------------------------------|-------------|---------------------------------------------------|-------------|
|                                              | HR                                                                          | 95% CI      | HR                                                | 95% CI      |
| Chronic illness (1 <sup>st</sup> definition) |                                                                             |             |                                                   |             |
| No                                           | 1.36                                                                        | (1.11–1.66) | 1.27                                              | (0.95–1.69) |
| Yes                                          | 1.26                                                                        | (0.97–1.65) | 1.72                                              | (1.25–2.37) |
| Chronic illness (2 <sup>nd</sup> definition) |                                                                             |             |                                                   |             |
| No                                           | 1.19                                                                        | (0.91–1.54) | 1.18                                              | (0.80–1.75) |
| Yes                                          | 1.42                                                                        | (1.16–1.73) | 1.71                                              | (1.32–2.20) |

25(OH)D: 25-hydroxyvitamin D; CI: confidence interval; HR: hazard ratio

Secondary analyses: missing values ('unknown' in Tables 1 and 2) in covariates body mass index, daily smoker, alcohol consumption, physical activity, education, economic difficulties, and chronic illness (1<sup>st</sup> and 2<sup>nd</sup> definitions) were imputed by using multivariable chained imputation with fully conditional specification.

Model 2 adjusted for season of blood draw, age, sex, BMI, smoking, alcohol consumption, physical activity, education and economic difficulties.

**Supplementary table 3.** The association of 25(OH)D level with all-cause mortality in subjects without chronic illness (1<sup>st</sup> definition) in Model 2, with further exclusion of the first 3 years of follow-up in secondary analyses

|                                  | HR   | 95% CI      |
|----------------------------------|------|-------------|
| 25(OH)D level quartiles (nmol/L) |      |             |
| 1 <sup>st</sup> (<34.5)          | 1.40 | (1.13–1.73) |
| 2 <sup>nd</sup> (34.5–45.1)      | 0.97 | (0.78–1.20) |
| 3 <sup>rd</sup> (45.2–58.0)      | 1.12 | (0.92–1.37) |
| 4 <sup>th</sup> (≥58.1)          | 1.00 |             |
| 25(OH)D level nmol/L             |      |             |
| <25.0                            | 1.32 | (0.96–1.80) |
| 25.0–49.9                        | 1.08 | (0.92–1.27) |
| 50.0–74.9                        | 1.00 |             |
| ≥75.0                            | 1.02 | (0.76–1.38) |

25(OH)D: 25-hydroxyvitamin D; CI: confidence interval; HR: hazard ratio

Secondary analyses: missing values (‘unknown’ in Tables 1 and 2) in covariates body mass index, daily smoker, alcohol consumption, physical activity, education, economic difficulties, and chronic illness (1<sup>st</sup> and 2<sup>nd</sup> definitions) were imputed by using multivariable chained imputation with fully conditional specification.

Model 2 adjusted for season of blood draw, age, sex, BMI, smoking, alcohol consumption, physical activity, education and economic difficulties.
